# Supplementary material for: m6A RNA methylation regulators can contribute to malignant progression and impact the prognosis of bladder cancer
Source: PubMed Central journal article supplement (PMC6923333; doi:10.1042/bsr20192892), 2019-12-20
Supplement: BSR-2019-2892_supp.pdf [file BSR-2019-2892_supp.pdf]

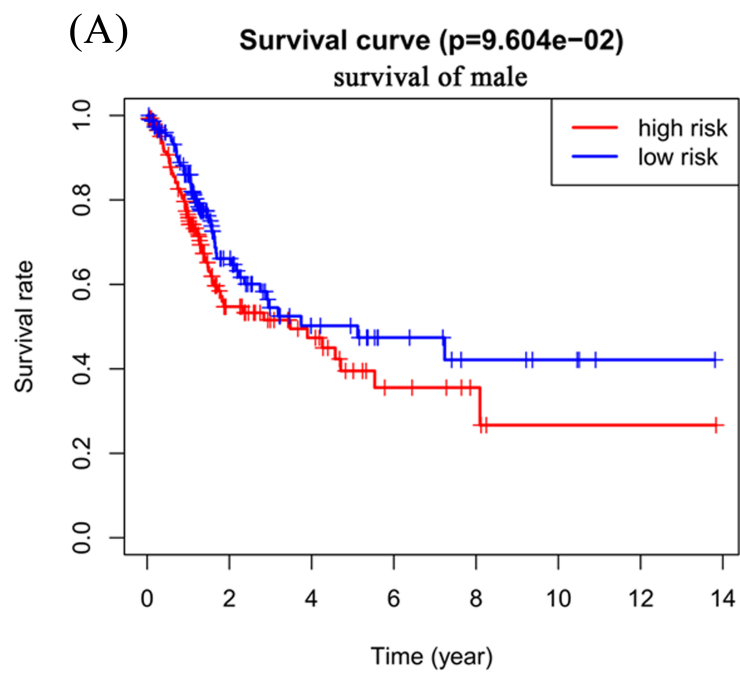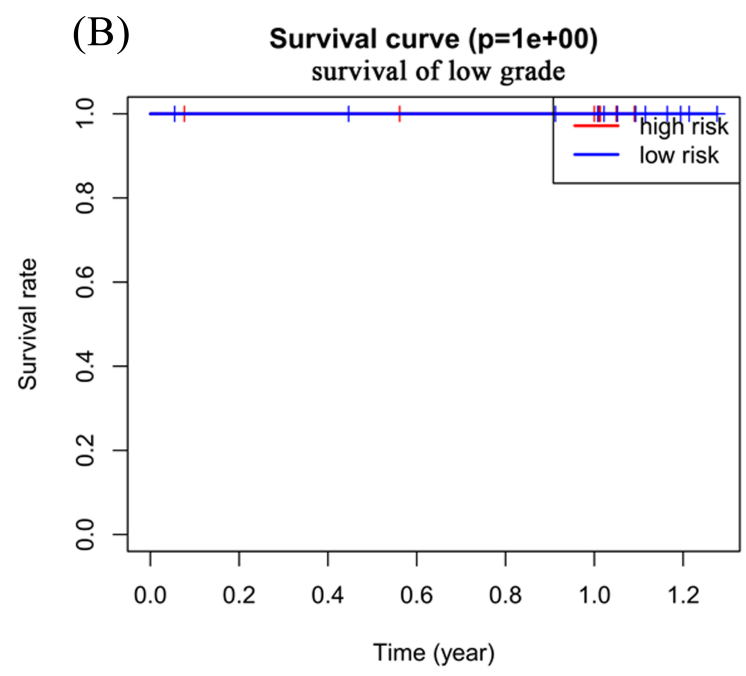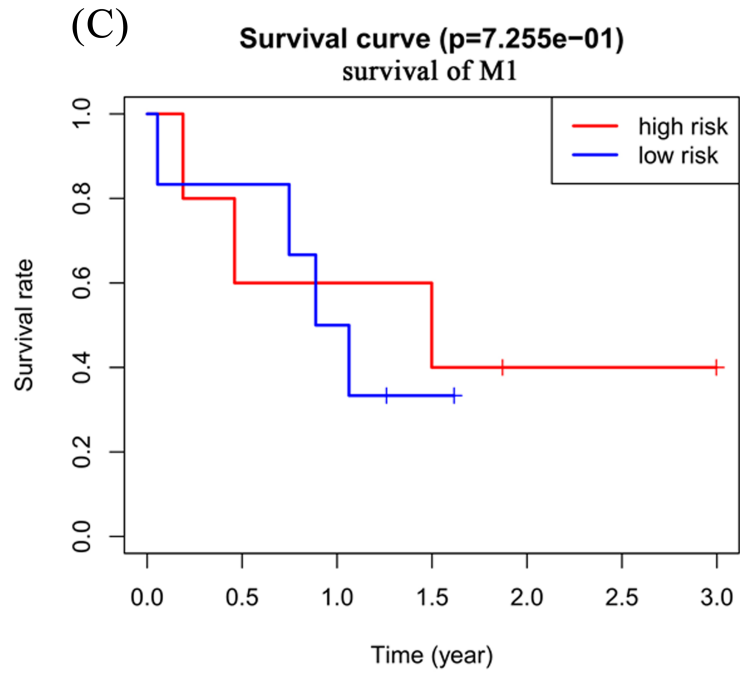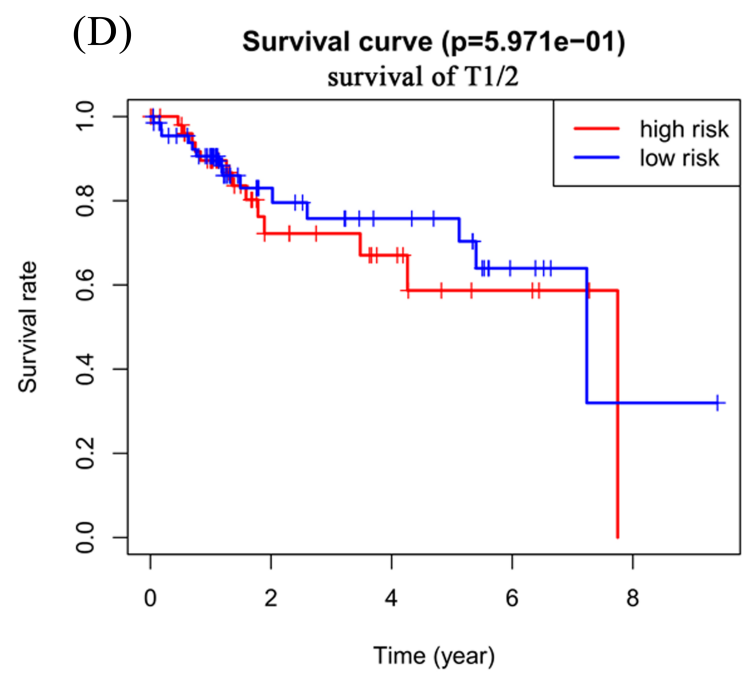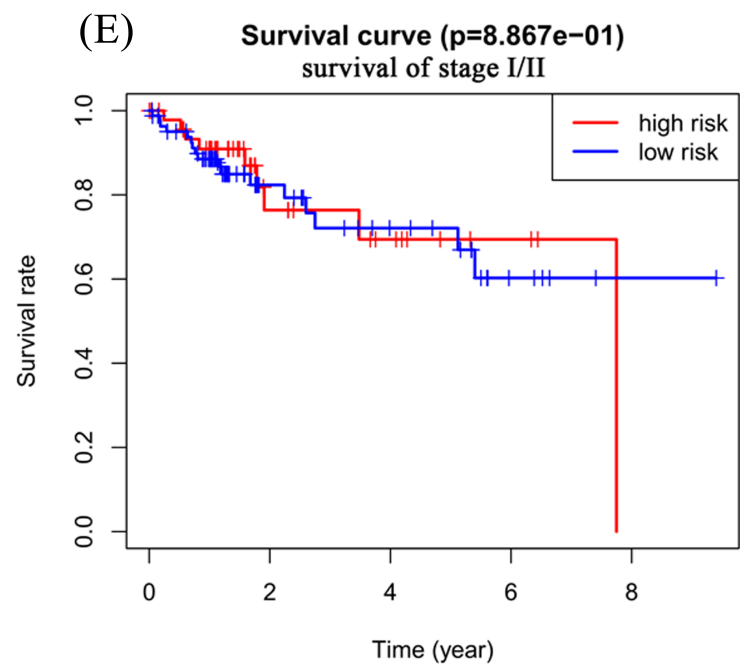

**Figure S.** Prognostic value of the risk signature in BC patients classified into specific cohorts. Kaplan-Meier survival curve for patients with (A) male, (B) low grade, (C) M1, (D) T1/2, (E) stage I/II
